# Supplementary material
Source: Springer Nature journal article supplement (https://www.springermedizin.de/resource/supplementary/12885_2012_3342_MOESM3_ESM.pdf/9463276)
Supplement: MOESM3 [file 9463276]

**a**

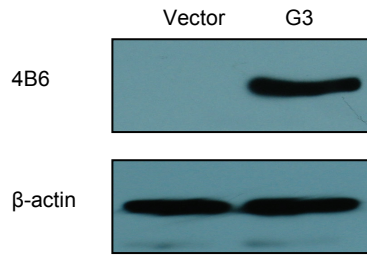

**b**

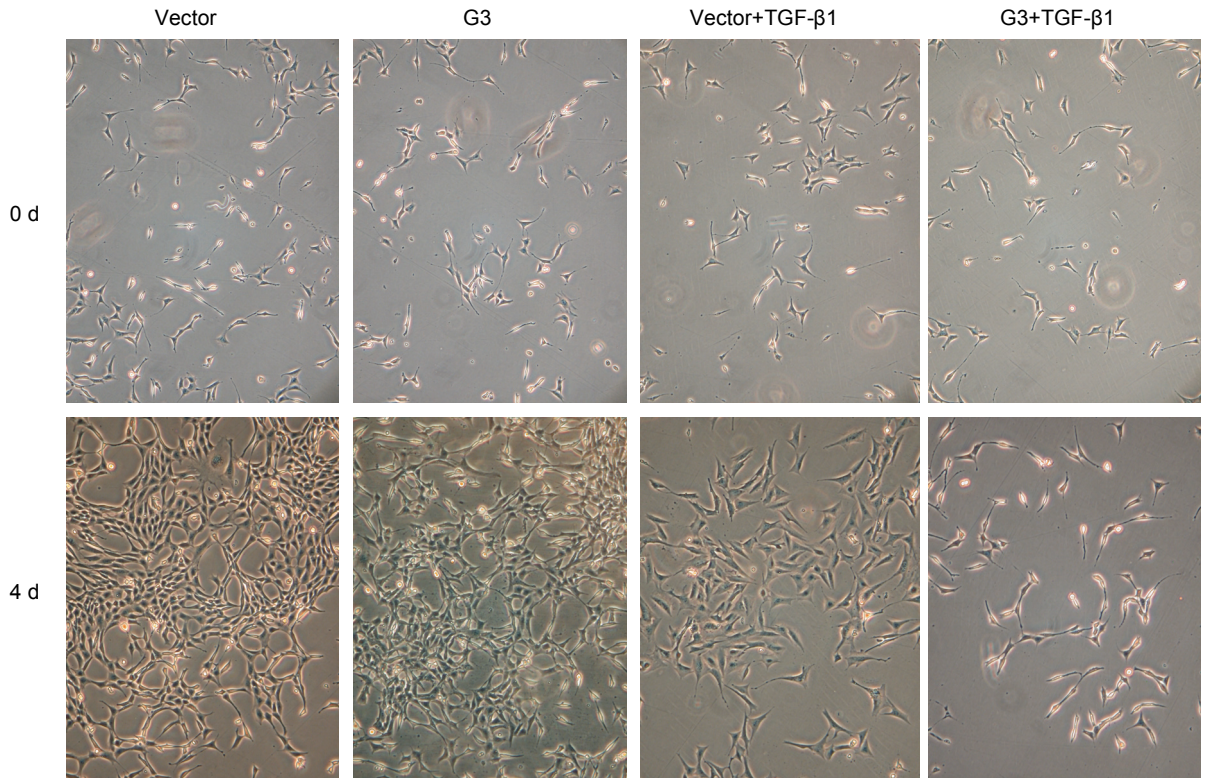

Figure S3
